# Supplementary material for: Hydrogen abstraction from n-butanol by the methyl radical: high level ab initio study of abstraction pathways and the importance of low energy rotational conformers
Source: Royal Society of Chemistry journal article supplement (doi:10.1039/c2cp24074b), 2012-01-01
Supplement: c2cp24074b.pdf [file c2cp24074b.pdf]

# **Hydrogen Abstraction from n-Butanol by the Methyl Radical: High Level Ab Initio Abstraction Pathways and the Importance of Low Energy Rotational Conformers<sup>†</sup>**

**D. Katsikadacos, Y. Hardalupas, A.M.K.P. Taylor and P.A. Hunt**

## **Supplementary Information**

### S1. Coordinates (xyz) for the n-butanol conformers computed at the ROCBS-QB3 level

#### TGt

|   |              |              |              |
|---|--------------|--------------|--------------|
| C | 1.448269000  | 0.519321000  | 0.222466000  |
| C | 0.006316000  | 0.707080000  | -0.225741000 |
| H | 2.068883000  | 1.333937000  | -0.177345000 |
| H | 1.504454000  | 0.562194000  | 1.320885000  |
| C | -0.962227000 | -0.319899000 | 0.370974000  |
| H | -0.310973000 | 1.721822000  | 0.044931000  |
| H | -0.021570000 | 0.648884000  | -1.320179000 |
| H | -0.592918000 | -1.322828000 | 0.140854000  |
| H | -0.951070000 | -0.229109000 | 1.464527000  |
| C | -2.395802000 | -0.158568000 | -0.140864000 |
| H | -3.063925000 | -0.900712000 | 0.304620000  |
| H | -2.795546000 | 0.832729000  | 0.096817000  |
| H | -2.442485000 | -0.280954000 | -1.227497000 |
| O | 1.903979000  | -0.745306000 | -0.260078000 |
| H | 2.793981000  | -0.891112000 | 0.072002000  |

#### TGg

|   |              |              |              |
|---|--------------|--------------|--------------|
| C | 1.458349000  | 0.518812000  | 0.219498000  |
| C | 0.011616000  | 0.705669000  | -0.237459000 |
| H | 2.090053000  | 1.315022000  | -0.198961000 |
| H | 1.521820000  | 0.590691000  | 1.308736000  |
| C | -0.964386000 | -0.298542000 | 0.384142000  |
| H | -0.300378000 | 1.730497000  | 0.002396000  |
| H | -0.027812000 | 0.626188000  | -1.333494000 |
| H | -0.589696000 | -1.309665000 | 0.200669000  |
| H | -0.964276000 | -0.166840000 | 1.473036000  |
| C | -2.392924000 | -0.162746000 | -0.148555000 |
| H | -3.062529000 | -0.890209000 | 0.318170000  |
| H | -2.798841000 | 0.834972000  | 0.047173000  |
| H | -2.429206000 | -0.326327000 | -1.230410000 |
| O | 1.986149000  | -0.767264000 | -0.103749000 |
| H | 1.995742000  | -0.845370000 | -1.063086000 |

#### TTt

|   |              |              |              |
|---|--------------|--------------|--------------|
| C | 1.319353000  | 0.479579000  | 0.000001000  |
| C | 0.035431000  | -0.335058000 | 0.000002000  |
| H | 1.347379000  | 1.128875000  | -0.888107000 |
| H | 1.347383000  | 1.128873000  | 0.888109000  |
| C | -1.229761000 | 0.528792000  | -0.000001000 |
| H | 0.043581000  | -0.989921000 | -0.878434000 |
| H | 0.043578000  | -0.989916000 | 0.878442000  |
| H | -1.221253000 | 1.187962000  | 0.876608000  |
| H | -1.221254000 | 1.187957000  | -0.876614000 |
| C | -2.518660000 | -0.298095000 | 0.000000000  |
| H | -3.404189000 | 0.343178000  | -0.000005000 |
| H | -2.573981000 | -0.942453000 | -0.882700000 |
| H | -2.573986000 | -0.942446000 | 0.882704000  |
| O | 2.417934000  | -0.430670000 | -0.000003000 |
| H | 3.231090000  | 0.081950000  | 0.000010000  |

**TTg**

|   |              |              |              |
|---|--------------|--------------|--------------|
| C | -1.325721000 | 0.491736000  | 0.021250000  |
| C | -0.039375000 | -0.330849000 | -0.022765000 |
| H | -1.353377000 | 1.098323000  | 0.939069000  |
| H | -1.358972000 | 1.183207000  | -0.824869000 |
| C | 1.232078000  | 0.523912000  | 0.024040000  |
| H | -0.036540000 | -1.032582000 | 0.823155000  |
| H | -0.051222000 | -0.941064000 | -0.932746000 |
| H | 1.226739000  | 1.222626000  | -0.821053000 |
| H | 1.222309000  | 1.142317000  | 0.929775000  |
| C | 2.518404000  | -0.306179000 | -0.010971000 |
| H | 3.405551000  | 0.332025000  | 0.019421000  |
| H | 2.571307000  | -0.989687000 | 0.842116000  |
| H | 2.573744000  | -0.909939000 | -0.921850000 |
| O | -2.499610000 | -0.307738000 | -0.096504000 |
| H | -2.514969000 | -0.915047000 | 0.649695000  |

**TGg'**

|   |              |              |              |
|---|--------------|--------------|--------------|
| C | 1.457866000  | 0.515508000  | 0.241193000  |
| C | 0.008751000  | 0.716665000  | -0.203291000 |
| H | 2.078434000  | 1.330741000  | -0.137544000 |
| H | 1.520671000  | 0.539239000  | 1.339682000  |
| C | -0.955803000 | -0.358689000 | 0.309700000  |
| H | -0.325544000 | 1.702186000  | 0.146044000  |
| H | -0.019177000 | 0.740742000  | -1.298721000 |
| H | -0.629623000 | -1.340787000 | -0.053124000 |
| H | -0.904569000 | -0.398090000 | 1.405469000  |
| C | -2.405457000 | -0.126964000 | -0.125331000 |
| H | -3.066149000 | -0.912893000 | 0.250278000  |
| H | -2.781205000 | 0.830629000  | 0.248077000  |
| H | -2.490976000 | -0.112933000 | -1.216050000 |
| O | 2.044741000  | -0.678938000 | -0.272843000 |
| H | 1.628070000  | -1.426453000 | 0.165004000  |

**GGt**

|   |              |              |              |
|---|--------------|--------------|--------------|
| C | 1.177372000  | 0.119209000  | 0.606164000  |
| C | 0.072772000  | 1.009260000  | 0.051233000  |
| H | 1.941346000  | 0.747122000  | 1.086405000  |
| H | 0.775044000  | -0.557537000 | 1.373299000  |
| C | -1.079380000 | 0.251835000  | -0.626344000 |
| H | -0.315940000 | 1.625075000  | 0.872060000  |
| H | 0.526864000  | 1.695681000  | -0.671449000 |
| H | -1.735499000 | 0.983766000  | -1.109845000 |
| H | -0.664223000 | -0.370054000 | -1.424153000 |
| C | -1.911754000 | -0.616131000 | 0.323382000  |
| H | -2.747191000 | -1.083199000 | -0.205320000 |
| H | -1.318200000 | -1.421646000 | 0.764574000  |
| H | -2.329482000 | -0.022338000 | 1.143409000  |
| O | 1.738848000  | -0.620476000 | -0.478966000 |
| H | 2.402432000  | -1.218110000 | -0.123867000 |

### GGg

|   |              |              |              |
|---|--------------|--------------|--------------|
| C | 1.177839000  | 0.087626000  | 0.624805000  |
| C | 0.081232000  | 0.999195000  | 0.070103000  |
| H | 1.942586000  | 0.695205000  | 1.128929000  |
| H | 0.771680000  | -0.600094000 | 1.369792000  |
| C | -1.067534000 | 0.261070000  | -0.633151000 |
| H | -0.312992000 | 1.608295000  | 0.894135000  |
| H | 0.540776000  | 1.704994000  | -0.635160000 |
| H | -1.701673000 | 0.999296000  | -1.135825000 |
| H | -0.644806000 | -0.373542000 | -1.417906000 |
| C | -1.931477000 | -0.591752000 | 0.301721000  |
| H | -2.760249000 | -1.051286000 | -0.243496000 |
| H | -1.357093000 | -1.401125000 | 0.759868000  |
| H | -2.359936000 | 0.012804000  | 1.108043000  |
| O | 1.768233000  | -0.745074000 | -0.372526000 |
| H | 2.175478000  | -0.170787000 | -1.029045000 |

### GTt

|   |              |              |              |
|---|--------------|--------------|--------------|
| C | -1.036615000 | -0.359730000 | 0.310597000  |
| C | -0.094918000 | 0.698998000  | -0.245217000 |
| H | -0.709830000 | -1.364085000 | 0.008141000  |
| H | -1.025582000 | -0.320849000 | 1.410840000  |
| C | 1.347873000  | 0.596640000  | 0.269668000  |
| H | -0.109166000 | 0.634583000  | -1.339162000 |
| H | -0.510377000 | 1.677972000  | 0.015048000  |
| H | 1.898290000  | 1.478367000  | -0.074635000 |
| H | 1.347808000  | 0.652195000  | 1.365348000  |
| C | 2.099292000  | -0.663019000 | -0.178371000 |
| H | 3.139416000  | -0.639648000 | 0.158051000  |
| H | 1.648546000  | -1.575351000 | 0.221500000  |
| H | 2.105368000  | -0.748322000 | -1.269693000 |
| O | -2.342438000 | -0.083542000 | -0.195599000 |
| H | -2.938758000 | -0.763857000 | 0.129287000  |

### GTg'

|   |              |              |              |
|---|--------------|--------------|--------------|
| C | -1.039680000 | -0.363053000 | 0.333822000  |
| C | -0.101053000 | 0.683883000  | -0.266129000 |
| H | -0.706918000 | -1.372772000 | 0.085403000  |
| H | -1.038864000 | -0.278567000 | 1.431547000  |
| C | 1.343991000  | 0.613521000  | 0.251152000  |
| H | -0.117253000 | 0.578955000  | -1.356909000 |
| H | -0.510250000 | 1.678441000  | -0.043139000 |
| H | 1.887251000  | 1.490485000  | -0.115996000 |
| H | 1.342393000  | 0.696897000  | 1.345064000  |
| C | 2.103690000  | -0.651989000 | -0.164315000 |
| H | 3.142506000  | -0.613591000 | 0.174390000  |
| H | 1.657424000  | -1.556692000 | 0.256813000  |
| H | 2.113448000  | -0.763791000 | -1.253083000 |
| O | -2.364331000 | -0.270326000 | -0.184078000 |
| H | -2.696776000 | 0.609072000  | 0.021352000  |

**GTg**

|   |              |              |              |
|---|--------------|--------------|--------------|
| C | -1.043665000 | -0.357571000 | 0.339219000  |
| C | -0.100238000 | 0.687285000  | -0.257177000 |
| H | -0.712874000 | -1.374273000 | 0.087154000  |
| H | -1.046723000 | -0.277063000 | 1.429805000  |
| C | 1.347326000  | 0.607472000  | 0.251977000  |
| H | -0.105634000 | 0.589242000  | -1.352062000 |
| H | -0.517645000 | 1.674028000  | -0.031631000 |
| H | 1.891241000  | 1.485463000  | -0.111734000 |
| H | 1.347689000  | 0.685915000  | 1.346031000  |
| C | 2.105150000  | -0.656967000 | -0.171079000 |
| H | 3.144154000  | -0.622459000 | 0.167462000  |
| H | 1.657247000  | -1.563508000 | 0.244178000  |
| H | 2.115872000  | -0.761955000 | -1.260841000 |
| O | -2.398530000 | -0.158469000 | -0.059866000 |
| H | -2.436523000 | -0.248954000 | -1.017069000 |

**GGg'**

|   |              |              |              |
|---|--------------|--------------|--------------|
| C | 1.194904000  | 0.144429000  | 0.594927000  |
| C | 0.087527000  | 1.020078000  | 0.003596000  |
| H | 1.979804000  | 0.781159000  | 1.009142000  |
| H | 0.807810000  | -0.468228000 | 1.420918000  |
| C | -1.080773000 | 0.248226000  | -0.629842000 |
| H | -0.295569000 | 1.674569000  | 0.797425000  |
| H | 0.538624000  | 1.669262000  | -0.754161000 |
| H | -1.743012000 | 0.966082000  | -1.124526000 |
| H | -0.696118000 | -0.392060000 | -1.433254000 |
| C | -1.901216000 | -0.591895000 | 0.355824000  |
| H | -2.742756000 | -1.075974000 | -0.146823000 |
| H | -1.305223000 | -1.381080000 | 0.823673000  |
| H | -2.308049000 | 0.030086000  | 1.159312000  |
| O | 1.842458000  | -0.672159000 | -0.379962000 |
| H | 1.222169000  | -1.351572000 | -0.659031000 |

**GG'g'**

|   |              |              |              |
|---|--------------|--------------|--------------|
| C | 1.363857000  | 0.380128000  | -0.228018000 |
| C | 0.107162000  | 1.011938000  | 0.374298000  |
| H | 1.374051000  | 0.530069000  | -1.311247000 |
| H | 2.253655000  | 0.882676000  | 0.178195000  |
| C | -1.229383000 | 0.586129000  | -0.255042000 |
| H | 0.087208000  | 0.812295000  | 1.455531000  |
| H | 0.215807000  | 2.099363000  | 0.274911000  |
| H | -2.005601000 | 1.278682000  | 0.089882000  |
| H | -1.166284000 | 0.722579000  | -1.341780000 |
| C | -1.671167000 | -0.849041000 | 0.055762000  |
| H | -2.645260000 | -1.062299000 | -0.393674000 |
| H | -0.949319000 | -1.575062000 | -0.318566000 |
| H | -1.768409000 | -0.999974000 | 1.136603000  |
| O | 1.465160000  | -1.032244000 | -0.044304000 |
| H | 1.460065000  | -1.205304000 | 0.902577000  |

**G'Gt**

|   |              |              |              |
|---|--------------|--------------|--------------|
| C | 1.353872000  | 0.394291000  | 0.221352000  |
| C | 0.091598000  | 1.009733000  | -0.369356000 |
| H | 2.231307000  | 0.921055000  | -0.180745000 |
| H | 1.353447000  | 0.532432000  | 1.313520000  |
| C | -1.235162000 | 0.568601000  | 0.271076000  |
| H | 0.188279000  | 2.097117000  | -0.265256000 |
| H | 0.077564000  | 0.800202000  | -1.445464000 |
| H | -1.157944000 | 0.686056000  | 1.359671000  |
| H | -2.016566000 | 1.266958000  | -0.050062000 |
| C | -1.679042000 | -0.860481000 | -0.062141000 |
| H | -2.640181000 | -1.088015000 | 0.408581000  |
| H | -1.799645000 | -0.986901000 | -1.142764000 |
| H | -0.942705000 | -1.591754000 | 0.270815000  |
| O | 1.413623000  | -0.993520000 | -0.114146000 |
| H | 2.209861000  | -1.361860000 | 0.279291000  |

**GG'g**

|   |              |              |              |
|---|--------------|--------------|--------------|
| C | -1.312517000 | 0.366950000  | 0.319366000  |
| C | -0.102981000 | 1.031587000  | -0.345894000 |
| H | -1.186241000 | 0.357414000  | 1.412907000  |
| H | -2.209480000 | 0.952294000  | 0.104646000  |
| C | 1.280447000  | 0.591730000  | 0.161104000  |
| H | -0.180879000 | 0.857891000  | -1.425498000 |
| H | -0.189604000 | 2.114979000  | -0.197119000 |
| H | 2.037228000  | 1.185705000  | -0.362806000 |
| H | 1.373341000  | 0.856827000  | 1.221592000  |
| C | 1.620368000  | -0.894366000 | -0.016227000 |
| H | 2.670392000  | -1.083798000 | 0.222546000  |
| H | 1.033255000  | -1.535403000 | 0.650465000  |
| H | 1.447266000  | -1.225194000 | -1.044368000 |
| O | -1.601653000 | -0.940783000 | -0.173903000 |
| H | -0.893960000 | -1.529851000 | 0.098764000  |

## S2. Transition States and products structures for the reaction of the TGt conformer

### rad<sub>α</sub>

|   |              |              |              |
|---|--------------|--------------|--------------|
| C | 1.446987000  | 0.530539000  | 0.196141000  |
| C | 0.036379000  | 0.684844000  | -0.248115000 |
| H | 1.774436000  | 0.913288000  | 1.161537000  |
| C | -0.951599000 | -0.322241000 | 0.389164000  |
| H | -0.291678000 | 1.706322000  | -0.024178000 |
| H | -0.004913000 | 0.571037000  | -1.339373000 |
| H | -0.587285000 | -1.334903000 | 0.191424000  |
| H | -0.938993000 | -0.193628000 | 1.477615000  |
| C | -2.380682000 | -0.166002000 | -0.135728000 |
| H | -3.057582000 | -0.888419000 | 0.328790000  |
| H | -2.772373000 | 0.835476000  | 0.069874000  |
| H | -2.422224000 | -0.320610000 | -1.218448000 |
| O | 2.057763000  | -0.620633000 | -0.250101000 |
| H | 2.932002000  | -0.686333000 | 0.144794000  |

### TS<sub>α,(H3)</sub>

|   |              |              |              |
|---|--------------|--------------|--------------|
| C | -0.806036000 | 0.420871000  | 0.399262000  |
| C | 0.376491000  | -0.421388000 | -0.015805000 |
| H | -1.862392000 | -0.273663000 | 0.183453000  |
| H | -0.833485000 | 0.624350000  | 1.479249000  |
| C | 1.737544000  | 0.233278000  | 0.270907000  |
| H | 0.311490000  | -1.386676000 | 0.500403000  |
| H | 0.290614000  | -0.630370000 | -1.088896000 |
| H | 1.761549000  | 1.213766000  | -0.212897000 |
| H | 1.827167000  | 0.416501000  | 1.348621000  |
| C | 2.919022000  | -0.615568000 | -0.205724000 |
| H | 3.872951000  | -0.127586000 | 0.012419000  |
| H | 2.928266000  | -1.595596000 | 0.282183000  |
| H | 2.872463000  | -0.784982000 | -1.285941000 |
| O | -0.859549000 | 1.594331000  | -0.371710000 |
| H | -1.548321000 | 2.164675000  | -0.017895000 |
| C | -3.049329000 | -1.070764000 | -0.084701000 |
| H | -3.874412000 | -0.468685000 | 0.288857000  |
| H | -3.041783000 | -1.189623000 | -1.165105000 |
| H | -2.893871000 | -1.995333000 | 0.465598000  |

| <b>TS<sub><math>\alpha_1(H4)</math></sub></b> |              |              |              |
|-----------------------------------------------|--------------|--------------|--------------|
| C                                             | -0.941734000 | -0.693748000 | 0.489836000  |
| C                                             | 0.509951000  | -0.376124000 | 0.767909000  |
| H                                             | -1.471308000 | -1.063631000 | 1.378258000  |
| H                                             | -1.548713000 | 0.408884000  | 0.216310000  |
| C                                             | 1.255170000  | 0.251510000  | -0.417574000 |
| H                                             | 0.552651000  | 0.293525000  | 1.635260000  |
| H                                             | 1.019594000  | -1.303993000 | 1.064398000  |
| H                                             | 1.156036000  | -0.407966000 | -1.283857000 |
| H                                             | 0.767715000  | 1.194464000  | -0.689255000 |
| C                                             | 2.735114000  | 0.504273000  | -0.119341000 |
| H                                             | 3.242631000  | 0.952374000  | -0.977872000 |
| H                                             | 2.860830000  | 1.182396000  | 0.731066000  |
| H                                             | 3.254616000  | -0.428224000 | 0.122937000  |
| O                                             | -1.051420000 | -1.569104000 | -0.603309000 |
| H                                             | -1.976910000 | -1.805179000 | -0.715808000 |
| C                                             | -2.265797000 | 1.636375000  | -0.089268000 |
| H                                             | -3.296544000 | 1.428184000  | 0.188865000  |
| H                                             | -2.113734000 | 1.769715000  | -1.157339000 |
| H                                             | -1.791736000 | 2.398575000  | 0.524132000  |

| <b>rad<sub><math>\beta</math></sub></b> |              |              |              |
|-----------------------------------------|--------------|--------------|--------------|
| C                                       | 1.473861000  | 0.561194000  | 0.076225000  |
| C                                       | 0.006362000  | 0.739440000  | -0.083593000 |
| H                                       | 2.007617000  | 1.276111000  | -0.566719000 |
| H                                       | 1.770987000  | 0.788082000  | 1.119899000  |
| C                                       | -0.970893000 | -0.269422000 | 0.417308000  |
| H                                       | -0.350892000 | 1.724524000  | -0.369420000 |
| H                                       | -0.557928000 | -1.270693000 | 0.262639000  |
| H                                       | -1.081092000 | -0.165691000 | 1.512843000  |
| C                                       | -2.356544000 | -0.155491000 | -0.230173000 |
| H                                       | -3.046337000 | -0.896953000 | 0.181507000  |
| H                                       | -2.792360000 | 0.834316000  | -0.061915000 |
| H                                       | -2.296253000 | -0.313326000 | -1.310256000 |
| O                                       | 1.837677000  | -0.786752000 | -0.241897000 |
| H                                       | 2.728124000  | -0.936675000 | 0.087994000  |



**TS <sub>$\beta$ , (H6)</sub>**

|   |              |              |              |
|---|--------------|--------------|--------------|
| C | 1.426006000  | 0.653279000  | 0.115627000  |
| C | 0.104378000  | 0.090904000  | -0.347341000 |
| H | 1.642167000  | 1.587259000  | -0.421862000 |
| H | 1.374012000  | 0.886153000  | 1.189978000  |
| C | -0.403761000 | -1.118681000 | 0.413540000  |
| H | -0.758737000 | 1.068279000  | -0.168821000 |
| H | 0.089033000  | -0.052871000 | -1.431645000 |
| H | 0.378309000  | -1.888070000 | 0.395363000  |
| H | -0.537143000 | -0.851535000 | 1.470032000  |
| C | -1.708164000 | -1.694264000 | -0.144819000 |
| H | -2.029212000 | -2.571074000 | 0.423811000  |
| H | -2.517398000 | -0.959081000 | -0.108586000 |
| H | -1.586032000 | -2.001818000 | -1.187890000 |
| O | 2.446618000  | -0.320739000 | -0.139436000 |
| H | 3.278775000  | 0.025201000  | 0.197529000  |
| C | -1.653833000 | 2.123061000  | 0.045688000  |
| H | -2.004311000 | 1.989619000  | 1.066443000  |
| H | -1.062449000 | 3.024080000  | -0.099960000 |
| H | -2.427715000 | 1.983974000  | -0.705070000 |

**TS <sub>$\beta$ , (H7)</sub>**

|   |              |              |              |
|---|--------------|--------------|--------------|
| C | 1.376867000  | -0.721879000 | 0.592519000  |
| C | -0.034809000 | -0.194130000 | 0.660835000  |
| H | 2.017348000  | -0.159516000 | 1.287411000  |
| H | 1.393977000  | -1.779417000 | 0.908918000  |
| C | -1.042662000 | -0.862619000 | -0.255946000 |
| H | -0.378506000 | -0.129378000 | 1.698025000  |
| H | 0.061976000  | 1.070064000  | 0.307768000  |
| H | -0.689148000 | -0.786567000 | -1.288065000 |
| H | -1.068471000 | -1.939551000 | -0.027431000 |
| C | -2.457916000 | -0.290367000 | -0.134534000 |
| H | -3.153431000 | -0.814572000 | -0.795414000 |
| H | -2.837304000 | -0.383462000 | 0.888169000  |
| H | -2.481514000 | 0.769700000  | -0.400848000 |
| O | 1.849549000  | -0.597702000 | -0.750348000 |
| H | 2.724682000  | -0.992386000 | -0.796653000 |
| C | 0.269663000  | 2.396938000  | -0.080577000 |
| H | 0.982967000  | 2.301691000  | -0.894236000 |
| H | -0.704944000 | 2.771423000  | -0.383790000 |
| H | 0.669111000  | 2.885930000  | 0.805153000  |

**rad<sub>γ</sub>**

|   |              |              |              |
|---|--------------|--------------|--------------|
| C | -1.402684000 | 0.501923000  | -0.298653000 |
| C | 0.005340000  | 0.703394000  | 0.250275000  |
| H | -2.036706000 | 1.350998000  | -0.006486000 |
| H | -1.365856000 | 0.463999000  | -1.396630000 |
| C | 0.969652000  | -0.355849000 | -0.166970000 |
| H | 0.366915000  | 1.693921000  | -0.058600000 |
| H | -0.071925000 | 0.746112000  | 1.351518000  |
| H | 0.574636000  | -1.353523000 | -0.322339000 |
| C | 2.439781000  | -0.167848000 | -0.014933000 |
| H | 3.006176000  | -0.924499000 | -0.564066000 |
| H | 2.762168000  | 0.820100000  | -0.366675000 |
| H | 2.758712000  | -0.235413000 | 1.039639000  |
| O | -1.913444000 | -0.718995000 | 0.236094000  |
| H | -2.759094000 | -0.899452000 | -0.183425000 |

**TS<sub>γ,(H8)</sub>**

|   |              |              |              |
|---|--------------|--------------|--------------|
| C | -1.717135000 | -0.729751000 | 0.140317000  |
| C | -0.326245000 | -1.052656000 | -0.387259000 |
| H | -2.456733000 | -1.342298000 | -0.394851000 |
| H | -1.773812000 | -0.992337000 | 1.207549000  |
| C | 0.825430000  | -0.440558000 | 0.391362000  |
| H | -0.222271000 | -2.148976000 | -0.381838000 |
| H | -0.272410000 | -0.749778000 | -1.440328000 |
| H | 0.835297000  | 0.855417000  | 0.172773000  |
| H | 0.668013000  | -0.493394000 | 1.473304000  |
| C | 2.203535000  | -0.923040000 | -0.017402000 |
| H | 2.990445000  | -0.397259000 | 0.530272000  |
| H | 2.328201000  | -1.996772000 | 0.175396000  |
| H | 2.378015000  | -0.762940000 | -1.086533000 |
| O | -1.984157000 | 0.658798000  | -0.054653000 |
| H | -2.849143000 | 0.851655000  | 0.317938000  |
| C | 0.922859000  | 2.222312000  | -0.083944000 |
| H | -0.107968000 | 2.469374000  | -0.315217000 |
| H | 1.611387000  | 2.319879000  | -0.920382000 |
| H | 1.293568000  | 2.659210000  | 0.840697000  |

| <b>TS<sub><math>\gamma</math></sub>(H9)</b> |              |              |              |
|---------------------------------------------|--------------|--------------|--------------|
| C                                           | -1.631928000 | 0.369586000  | 0.501139000  |
| C                                           | -0.480758000 | -0.600361000 | 0.729881000  |
| H                                           | -2.348061000 | 0.291676000  | 1.331344000  |
| H                                           | -1.251558000 | 1.400626000  | 0.478757000  |
| C                                           | 0.618497000  | -0.509966000 | -0.312620000 |
| H                                           | -0.066986000 | -0.424361000 | 1.731087000  |
| H                                           | -0.894992000 | -1.619027000 | 0.741237000  |
| H                                           | 0.210263000  | -0.477641000 | -1.324204000 |
| H                                           | 1.160844000  | 0.671411000  | -0.185950000 |
| C                                           | 1.746738000  | -1.509673000 | -0.159562000 |
| H                                           | 2.528776000  | -1.349837000 | -0.906860000 |
| H                                           | 2.210311000  | -1.442702000 | 0.830557000  |
| H                                           | 1.383958000  | -2.538642000 | -0.279709000 |
| O                                           | -2.256934000 | 0.031070000  | -0.737772000 |
| H                                           | -2.933597000 | 0.688106000  | -0.922409000 |
| C                                           | 1.795529000  | 1.924197000  | -0.025968000 |
| H                                           | 1.223347000  | 2.609151000  | -0.647007000 |
| H                                           | 1.734443000  | 2.141038000  | 1.038111000  |
| H                                           | 2.810263000  | 1.758940000  | -0.379987000 |

| <b>rad<sub><math>\delta</math></sub></b> |              |              |              |
|------------------------------------------|--------------|--------------|--------------|
| C                                        | 1.384456000  | 0.500498000  | 0.252060000  |
| C                                        | -0.053244000 | 0.734733000  | -0.186233000 |
| H                                        | 2.016047000  | 1.328316000  | -0.100173000 |
| H                                        | 1.439979000  | 0.479862000  | 1.351059000  |
| C                                        | -1.033288000 | -0.322201000 | 0.347142000  |
| H                                        | -0.364402000 | 1.731413000  | 0.145736000  |
| H                                        | -0.082275000 | 0.739693000  | -1.281659000 |
| H                                        | -0.636688000 | -1.312465000 | 0.071023000  |
| H                                        | -1.030058000 | -0.306107000 | 1.445267000  |
| C                                        | -2.423499000 | -0.158366000 | -0.159098000 |
| H                                        | -3.269132000 | -0.549266000 | 0.393363000  |
| H                                        | -2.604924000 | 0.209967000  | -1.162648000 |
| O                                        | 1.822544000  | -0.740446000 | -0.302111000 |
| H                                        | 2.704550000  | -0.925831000 | 0.031699000  |

**TS<sub>δ,(H11)</sub>**

|   |              |              |              |
|---|--------------|--------------|--------------|
| C | 2.291936000  | 0.109722000  | 0.406099000  |
| C | 1.055375000  | 0.878998000  | -0.037471000 |
| H | 3.180073000  | 0.749415000  | 0.302512000  |
| H | 2.197535000  | -0.165620000 | 1.467497000  |
| C | -0.254945000 | 0.099051000  | 0.171882000  |
| H | 1.018262000  | 1.826511000  | 0.512885000  |
| H | 1.169446000  | 1.131074000  | -1.097590000 |
| H | -0.163173000 | -0.866193000 | -0.333672000 |
| H | -0.368781000 | -0.117376000 | 1.241805000  |
| C | -1.476625000 | 0.838329000  | -0.331041000 |
| H | -2.541273000 | 0.084328000  | -0.105793000 |
| H | -1.702754000 | 1.764639000  | 0.201639000  |
| H | -1.498792000 | 0.992881000  | -1.411621000 |
| O | 2.409598000  | -1.054160000 | -0.412501000 |
| H | 3.152009000  | -1.573896000 | -0.092567000 |
| C | -3.638268000 | -0.717790000 | 0.134769000  |
| H | -4.475198000 | -0.187908000 | -0.314227000 |
| H | -3.701620000 | -0.793075000 | 1.217957000  |
| H | -3.407352000 | -1.661355000 | -0.354250000 |

**TS<sub>δ,(H12)</sub>**

|   |              |              |              |
|---|--------------|--------------|--------------|
| C | -1.891577000 | -0.810554000 | 0.132791000  |
| C | -0.513892000 | -0.428540000 | -0.387614000 |
| H | -2.255993000 | -1.697882000 | -0.404040000 |
| H | -1.827586000 | -1.067074000 | 1.201209000  |
| C | 0.123736000  | 0.740250000  | 0.373644000  |
| H | 0.134872000  | -1.310190000 | -0.333810000 |
| H | -0.608547000 | -0.167986000 | -1.448126000 |
| H | -0.582442000 | 1.579556000  | 0.367294000  |
| H | 0.250464000  | 0.461398000  | 1.428018000  |
| C | 1.453666000  | 1.182575000  | -0.199192000 |
| H | 1.927971000  | 2.002988000  | 0.341503000  |
| H | 2.330249000  | 0.197381000  | -0.070498000 |
| H | 1.440853000  | 1.377036000  | -1.273750000 |
| O | -2.768328000 | 0.298217000  | -0.071380000 |
| H | -3.621778000 | 0.082696000  | 0.314433000  |
| C | 3.261157000  | -0.814718000 | 0.092220000  |
| H | 3.093831000  | -1.497690000 | -0.737474000 |
| H | 4.223889000  | -0.310444000 | 0.050152000  |
| H | 3.042297000  | -1.249603000 | 1.065042000  |

**TS<sub>δ,(H13)</sub>**

|   |              |              |              |
|---|--------------|--------------|--------------|
| C | 2.074987000  | -0.028945000 | 0.434073000  |
| C | 0.606365000  | -0.304667000 | 0.719966000  |
| H | 2.567372000  | 0.333629000  | 1.347560000  |
| H | 2.576040000  | -0.960296000 | 0.128959000  |
| C | -0.142878000 | -0.919230000 | -0.468652000 |
| H | 0.541044000  | -0.973371000 | 1.587003000  |
| H | 0.130654000  | 0.638361000  | 1.009725000  |
| H | -0.014313000 | -0.271319000 | -1.340693000 |
| H | 0.335128000  | -1.875780000 | -0.731116000 |
| C | -1.615556000 | -1.148736000 | -0.201223000 |
| H | -2.165695000 | -1.578200000 | -1.039737000 |
| H | -1.834065000 | -1.683050000 | 0.726228000  |
| H | -2.203873000 | 0.027694000  | -0.031448000 |
| O | 2.149909000  | 0.950659000  | -0.602572000 |
| H | 3.075583000  | 1.085995000  | -0.822759000 |
| C | -2.818551000 | 1.256836000  | 0.110941000  |
| H | -3.818001000 | 1.114762000  | -0.293920000 |
| H | -2.808332000 | 1.460597000  | 1.179223000  |
| H | -2.207023000 | 1.944156000  | -0.469079000 |

**1-butoxy radical**

|   |              |              |              |
|---|--------------|--------------|--------------|
| C | 1.516492000  | 0.416034000  | 0.198790000  |
| C | 0.063999000  | 0.708919000  | -0.187300000 |
| H | 2.199324000  | 1.236143000  | -0.093981000 |
| H | 1.627039000  | 0.375205000  | 1.304238000  |
| C | -0.917278000 | -0.343223000 | 0.337914000  |
| H | -0.206611000 | 1.704086000  | 0.187718000  |
| H | 0.003143000  | 0.758568000  | -1.280864000 |
| H | -0.566317000 | -1.330015000 | 0.020048000  |
| H | -0.890768000 | -0.344889000 | 1.434977000  |
| C | -2.354571000 | -0.122142000 | -0.139066000 |
| H | -3.026287000 | -0.889040000 | 0.255641000  |
| H | -2.736711000 | 0.851724000  | 0.183174000  |
| H | -2.416999000 | -0.156664000 | -1.231072000 |
| O | 2.020292000  | -0.770330000 | -0.255239000 |

**TS**<sub>OH,(H15)</sub>

|   |              |              |              |
|---|--------------|--------------|--------------|
| C | 0.589130000  | 0.776201000  | 0.202402000  |
| C | -0.906502000 | 0.799649000  | -0.138109000 |
| H | 1.034597000  | 1.745425000  | -0.065183000 |
| H | 0.709611000  | 0.630486000  | 1.286918000  |
| C | -1.665413000 | -0.455144000 | 0.305499000  |
| H | -1.340220000 | 1.688576000  | 0.337344000  |
| H | -1.011054000 | 0.935955000  | -1.220156000 |
| H | -1.195210000 | -1.331911000 | -0.147676000 |
| H | -1.557487000 | -0.573568000 | 1.390806000  |
| C | -3.151474000 | -0.410790000 | -0.059594000 |
| H | -3.669385000 | -1.315237000 | 0.270903000  |
| H | -3.651249000 | 0.445882000  | 0.404334000  |
| H | -3.289738000 | -0.326806000 | -1.142055000 |
| O | 1.174448000  | -0.277564000 | -0.527532000 |
| H | 2.332231000  | -0.364674000 | -0.235009000 |
| C | 3.584604000  | -0.392646000 | 0.140250000  |
| H | 3.560805000  | -0.606418000 | 1.206081000  |
| H | 3.982637000  | 0.588500000  | -0.107056000 |
| H | 3.996812000  | -1.199312000 | -0.461676000 |

Table 1: Rotational constants and vibrational frequencies of the transition state structures involved in the hydrogen abstraction by CH<sub>3</sub> from the TGt n-butanol conformer, computed at the ROCBS-QB3 level.

| Species                | $I_A, I_B, I_C$ (GHz)               | Frequencies (cm <sup>-1</sup> )                                                                                                                                                                                                                                                                                                                                                                              |
|------------------------|-------------------------------------|--------------------------------------------------------------------------------------------------------------------------------------------------------------------------------------------------------------------------------------------------------------------------------------------------------------------------------------------------------------------------------------------------------------|
| TS <sub>α,(H3)</sub>   | 5.2485207<br>1.3877381<br>1.1713934 | <i>i</i> 1466.9, 27.5, 75.6, 79.4, 97.1, 164.5, 242.9, 261.3, 326.7, 341.8, 409.7, 521.0, 527.3, 619.7, 749.6, 860.4, 874.0, 972.7, 1020.5, 1038.5, 1083.8, 1115.5, 1144.4, 1152.7, 1237.9, 1301.7, 1304.1, 1335.7, 1361.9, 1394.4, 1413.5, 1416.9, 1429.8, 1455.3, 1468.7, 1474.9, 1496.9, 1501.1, 1510.9, 2983.8, 3007.9, 3014.7, 3018.4, 3044.4, 3055.3, 3061.8, 3084.1, 3084.8, 3186.6, 3192.4, 3838.2   |
| TS <sub>α,(H4)</sub>   | 3.7787066<br>1.7332805<br>1.3812121 | <i>i</i> 1488.7, 45.6, 69.2, 80.1, 115.4, 163.9, 241.8, 259.8, 321.1, 340.1, 431.4, 504.8, 546.6, 619.6, 749.3, 849.2, 864.9, 969.9, 1005.5, 1043.0, 1090.4, 1112.4, 1152.3, 1164.5, 1233.4, 1276.3, 1325.9, 1334.8, 1353.5, 1399.2, 1414.3, 1419.2, 1428.6, 1456.7, 1468.0, 1473.5, 1498.0, 1501.5, 1512.6, 2981.2, 2996.1, 3016.8, 3026.0, 3034.6, 3054.4, 3061.7, 3084.4, 3086.3, 3185.0, 3191.1, 3837.3  |
| TS <sub>β,(H6)</sub>   | 3.1288666<br>2.0716888<br>1.3358654 | <i>i</i> 1602.5, 33.9, 78.1, 87.2, 104.2, 149.9, 226.9, 246.0, 274.6, 328.2, 430.7, 498.1, 537.4, 607.1, 782.9, 841.8, 923.3, 982.3, 1003.8, 1035.5, 1086.2, 1125.2, 1136.6, 1167.0, 1245.1, 1258.1, 1294.8, 1331.7, 1361.2, 1388.1, 1410.0, 1416.4, 1444.3, 1446.6, 1454.8, 1487.8, 1501.6, 1506.9, 1517.0, 2961.8, 2993.8, 2998.2, 3021.9, 3022.8, 3055.8, 3062.4, 3083.1, 3087.5, 3186.0, 3189.1, 3823.6  |
| TS <sub>β,(H7)</sub>   | 3.2735885<br>2.1423411<br>1.5347186 | <i>i</i> 1608.5, 33.6, 80.4, 87.8, 106.4, 166.6, 219.8, 246.7, 273.4, 343.2, 458.5, 485.0, 545.0, 629.3, 782.2, 847.4, 887.0, 974.4, 1001.3, 1036.7, 1105.8, 1123.0, 1130.6, 1147.1, 1230.3, 1261.1, 1295.3, 1324.7, 1368.6, 1385.2, 1412.6, 1418.0, 1439.7, 1446.1, 1454.1, 1488.8, 1501.7, 1507.2, 1511.8, 2925.1, 2963.8, 2980.8, 3021.8, 3049.8, 3057.5, 3062.2, 3084.7, 3090.6, 3185.2, 3199.3, 3843.4  |
| TS <sub>γ,(H8)</sub>   | 3.4876738<br>2.1714253<br>1.4400704 | <i>i</i> 1621.3, 34.0, 45.9, 120.1, 146.5, 167.6, 222.8, 235.8, 276.6, 330.6, 464.3, 492.2, 551.1, 558.0, 834.0, 843.3, 892.5, 982.4, 987.6, 1050.6, 1101.9, 1120.6, 1126.7, 1161.0, 1227.3, 1261.9, 1312.9, 1323.2, 1365.4, 1407.1, 1410.2, 1411.7, 1442.0, 1452.2, 1457.0, 1465.6, 1493.1, 1496.0, 1521.4, 2958.1, 2971.7, 2991.1, 2995.3, 3026.7, 3043.4, 3054.5, 3058.0, 3083.5, 3181.2, 3211.6, 3839.7  |
| TS <sub>γ,(H9)</sub>   | 3.5351552<br>1.8673954<br>1.4376871 | <i>i</i> 1572.0, 38.7, 49.5, 107.5, 133.4, 167.3, 219.0, 236.8, 283.0, 343.2, 460.1, 496.3, 541.9, 551.2, 819.6, 851.5, 901.5, 971.6, 1007.8, 1053.4, 1095.8, 1122.9, 1131.2, 1157.5, 230.2, 1258.4, 1303.5, 1330.2, 1370.7, 1400.1, 1408.6, 1414.0, 1447.0, 1448.2, 1452.5, 1466.3, 1492.8, 1495.5, 1523.4, 2970.5, 2979.5, 2998.1, 3005.3, 3026.2, 3049.1, 3054.9, 3077.3, 3094.4, 3184.8, 3187.3, 3843.5  |
| TS <sub>δ,(H11)</sub>  | 6.8559498<br>1.1098557<br>1.0155975 | <i>i</i> 1628.2, 29.6, 52.9, 79.4, 94.7, 160.2, 233.1, 275.6, 318.2, 363.4, 461.6, 518.1, 582.1, 681.7, 757.3, 863.8, 879.9, 976.3, 1029.8, 1041.9, 1073.4, 1119.0, 1141.1, 1148.5, 1239.6, 1254.4, 1303.6, 1327.8, 1336.6, 1382.1, 1386.0, 1392.4, 1447.5, 1447.7, 1450.5, 1464.4, 1475.8, 1503.3, 1521.6, 2960.6, 2988.7, 3004.7, 3020.3, 3048.4, 3052.7, 3054.4, 3071.8, 3121.5, 3184.4, 3185.4, 3843.7   |
| TS <sub>δ,(H12)</sub>  | 6.7203589<br>1.2449704<br>1.1149294 | <i>i</i> 1630.8, 39.6, 45.6, 67.3, 137.3, 169.1, 230.2, 277.9, 347.0, 365.7, 466.4, 509.5, 560.4, 689.1, 761.9, 845.3, 898.6, 974.4, 990.0, 1062.5, 1076.1, 1120.9, 1144.0, 1162.4, 1211.6, 1259.9, 1288.3, 1332.2, 1335.6, 1387.9, 1389.9, 1404.6, 1448.0, 1450.4, 1452.6, 1459.4, 1475.6, 1493.0, 1522.5, 2961.0, 2989.6, 2997.8, 3021.6, 3023.7, 3053.3, 3054.7, 3060.7, 3125.0, 3182.4, 3184.1, 3843.3   |
| TS <sub>δ,(H13)</sub>  | 4.6161195<br>1.4447638<br>1.2611939 | <i>i</i> 1634.5, 37.0, 47.9, 71.3, 143.9, 165.6, 231.1, 279.8, 340.9, 369.4, 468.6, 507.2, 563.3, 693.3, 763.9, 847.9, 886.7, 974.0, 998.4, 1058.1, 1080.4, 1123.6, 1142.2, 1157.9, 1215.8, 1254.2, 1294.7, 1323.2, 1339.0, 1386.8, 1389.4, 1405.3, 1447.8, 1449.6, 1453.0, 1460.0, 1475.8, 1493.8, 1522.3, 2959.6, 2965.1, 2989.6, 3018.0, 3048.5, 3053.6, 3054.6, 3067.1, 3123.8, 3183.9, 3185.5, 3843.3   |
| TS <sub>OH,(H15)</sub> | 9.8534862<br>1.1121587<br>1.062763  | <i>i</i> -1660.3, 33.7, 38.9, 73.4, 118.4, 153.6, 239.5, 257.6, 307.3, 393.5, 469.6, 539.3, 647.9, 750.5, 840.9, 854.0, 974.4, 981.0, 1029.7, 1064.7, 1101.2, 1138.9, 1165.3, 1195.2, 1251.1, 1269.7, 1326.0, 1333.7, 1351.6, 1393.9, 1401.7, 1414.4, 1429.1, 1440.5, 1475.5, 1497.0, 1501.5, 1511.9, 1525.8, 2954.1, 2985.4, 3008.8, 3011.8, 3017.6, 3047.8, 3057.7, 3062.1, 3084.2, 3085.5, 3191.0, 3192.1 |

Table 2: B3LYP/6-311G(2d,d,p) and MP2 6-311G(d,p) geometrical parameters of transition state structures. MP2 parameters are in brackets.

| Site     | Bond distances (Å) |                  |                  |                  | L              |
|----------|--------------------|------------------|------------------|------------------|----------------|
|          | $B_{react}$        | $B_{react}^{TS}$ | $B_{prod}$       | $B_{prod}^{TS}$  |                |
| $\alpha$ | 1.099<br>(1.099)   | 1.283<br>(1.277) | 1.091<br>(1.090) | 1.455<br>(1.401) | 0.51<br>(0.57) |
| $\beta$  | 1.096<br>(1.097)   | 1.316<br>(1.308) | 1.091<br>(1.090) | 1.398<br>(1.355) | 0.72<br>(0.80) |
| $\gamma$ | 1.097<br>(1.098)   | 1.306<br>(1.294) | 1.091<br>(1.090) | 1.413<br>(1.372) | 0.65<br>(0.70) |
| $\delta$ | 1.094<br>(1.095)   | 1.326<br>(1.313) | 1.091<br>(1.090) | 1.382<br>(1.348) | 0.80<br>(0.84) |
| OH       | 0.961<br>(0.959)   | 1.197<br>(1.262) | 1.091<br>(1.090) | 1.308<br>(1.219) | 1.09<br>(2.35) |



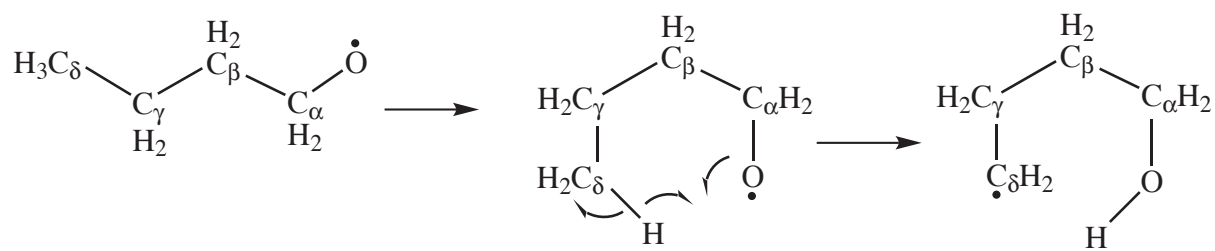

Figure 1: Key post H-abstraction reaction.
